# Supplementary material for: Dynamics in perioperative neutrophil-to-lymphocyte*platelet ratio as a predictor of early acute kidney injury following cardiovascular surgery
Source: PubMed Central journal article supplement (PMC8260043; doi:10.1080/0886022x.2021.1937220), 2021-06-30
Supplement: IRNF_A_1937220_SM5227.pdf [file IRNF_A_1937220_SM5227.pdf]

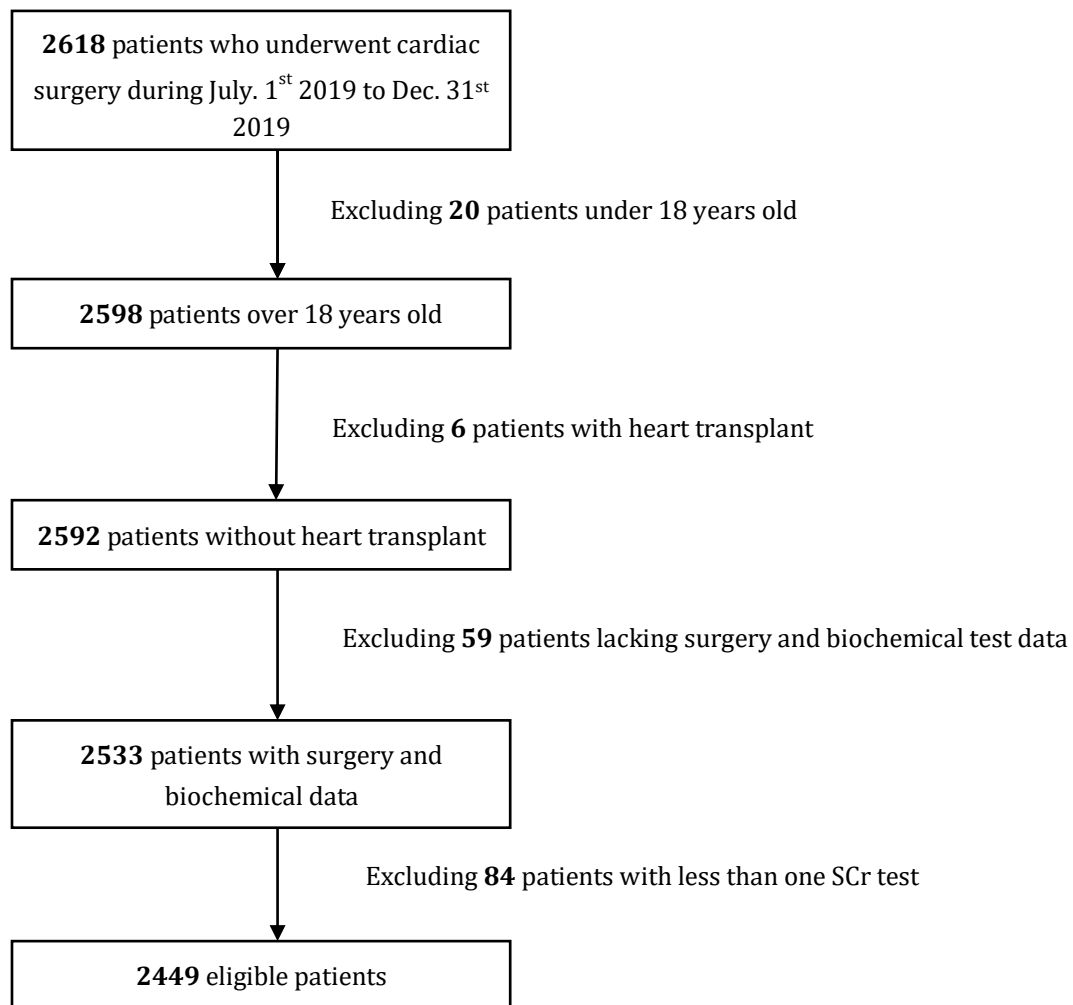

**Supplement Figure 1. Flow chart of the study population selection.**
